# Supplementary material for: Review and Prospects on the Ecotoxicity of Mixtures of Nanoparticles and Hybrid Nanomaterials
Source: PubMed Central journal article supplement (PMC9671040; doi:10.1021/acs.est.2c03333), 2022-10-05
Supplement: es2c03333_si_001.pdf [file es2c03333_si_001.pdf]

## Supporting Information

# Review and prospects on the ecotoxicity of mixtures of nanoparticles and hybrid nanomaterials

Fan Zhang <sup>a</sup>, Zhuang Wang <sup>b</sup>, Willie J.G.M. Peijnenburg <sup>a,c,\*</sup>, Martina G. Vijver <sup>a</sup>

<sup>a</sup> Institute of Environmental Sciences (CML), Leiden University, Leiden 2300 RA, The Netherlands

<sup>b</sup> Collaborative Innovation Center of Atmospheric Environment and Equipment Technology, Jiangsu Key Laboratory of Atmospheric Environment Monitoring and Pollution Control, School of Environmental Science and Engineering, Nanjing University of Information Science and Technology, Nanjing 210044, People's Republic of China

<sup>c</sup> Centre for Safety of Substances and Products, National Institute of Public Health and the Environment (RIVM), Bilthoven 3720 BA, The Netherlands

\* Corresponding author:

*E-mail address:* [peijnenburg@cml.leidenuniv.nl](mailto:peijnenburg@cml.leidenuniv.nl) (W. J. G. M. Peijnenburg)

*Tables 4*

*Figures 2*

*Pages 37*

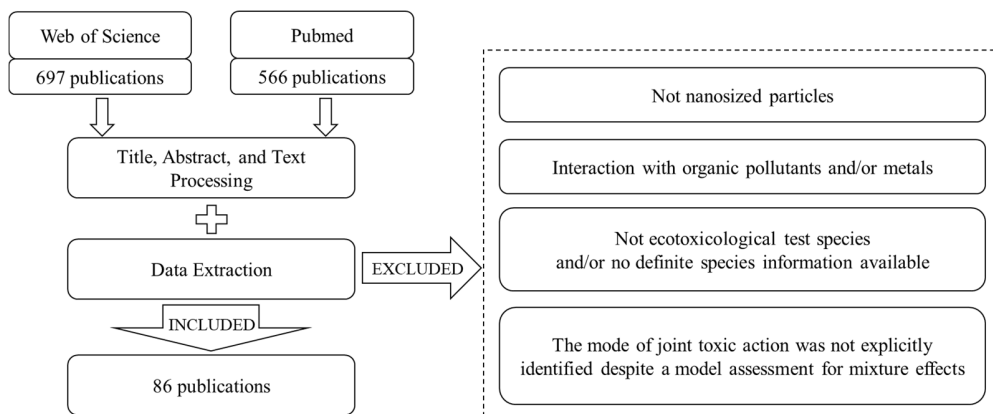

**Figure S1.** Flowchart showing the decision process for inclusion and exclusion of literature on the ecotoxicity of mixtures of nanomaterials, identified using the ISI Web of Knowledge and PubMed search.

**Table S1.** List of studies on the joint toxicological effects of multiple metal-based engineered nanoparticles (ENPs) on ecological species <sup>a</sup>

| ENPs<br>Types of mixtures                                                        | Ecological species          | Test concentrations                                                                                                                                                                   | Toxicity endpoints                                                                                                                                                                          | Types of<br>joint<br>interactions | References              |
|----------------------------------------------------------------------------------|-----------------------------|---------------------------------------------------------------------------------------------------------------------------------------------------------------------------------------|---------------------------------------------------------------------------------------------------------------------------------------------------------------------------------------------|-----------------------------------|-------------------------|
| <b>Algae</b>                                                                     |                             |                                                                                                                                                                                       |                                                                                                                                                                                             |                                   |                         |
| nTiO <sub>2</sub> (anatase) +<br>nTiO <sub>2</sub> (rutile)                      | <i>Chlorella</i> sp.        | nTiO <sub>2</sub> (anatase) + nTiO <sub>2</sub> (rutile): 0.25+0.25,<br>0.25+0.5, and 0.5+0.5 mg/L                                                                                    | Cell viability, chlorophyll<br>content,<br>uptake/internalization,<br>cell surface morphology,<br>ultra-structural changes,<br>DNA damage, and ROS<br>generation                            | Antagonistic                      | Iswarya et al.,<br>2015 |
|                                                                                  |                             | nTiO <sub>2</sub> (anatase) + nTiO <sub>2</sub> (rutile): 0.25+1,<br>0.5+0.25, 0.5+1, 1+0.25, 1+0.5, and 1+1 mg/L                                                                     |                                                                                                                                                                                             | Additive                          |                         |
| nSiO <sub>2</sub> + nTiO <sub>2</sub><br>(anatase@rutile)                        | <i>Scenedesmus obliquus</i> | nSiO <sub>2</sub> : 1 µg/L and 1 mg/L<br>nTiO <sub>2</sub> (anatase@rutile): 1 µg/L and 1 mg/L<br>nZrO <sub>2</sub> : 1 µg/L and 1 mg/L<br>Mixtures (1:1 and 1:1:1 ratios)            | Chlorophyll content,<br>intracellular levels of<br>ROS, mitochondrial<br>membrane potential,<br>permeability of cell<br>membrane, antioxidant<br>activities, and cell surface<br>morphology | n.d.                              | Liu et al., 2018        |
| nSiO <sub>2</sub> + nZrO <sub>2</sub>                                            |                             |                                                                                                                                                                                       |                                                                                                                                                                                             | n.d.                              |                         |
| nTiO <sub>2</sub><br>(anatase@rutile) +<br>nZrO <sub>2</sub>                     |                             |                                                                                                                                                                                       |                                                                                                                                                                                             | n.d.                              |                         |
| nSiO <sub>2</sub> + nTiO <sub>2</sub><br>(anatase@rutile) +<br>nZrO <sub>2</sub> |                             |                                                                                                                                                                                       |                                                                                                                                                                                             | Synergistic                       |                         |
| nCdS + nZnS                                                                      | <i>Heterosigma akashiwo</i> | nCdS: 12 mg/L<br>nSiO <sub>2</sub> (with no inclusions): 143.5 mg/L<br>nSiO <sub>2</sub> (with metal inclusions): 2.1 mg/L<br>nTiO <sub>2</sub> (anatase): 79.5 mg/L<br>nZnS: 53 mg/L | Growth inhibition,<br>esterase activity,<br>membrane potential, ROS<br>generation, and cell size                                                                                            | Antagonistic                      | Pikula et al., 2022     |
| nCdS +<br>nTiO <sub>2</sub> (anatase)                                            |                             |                                                                                                                                                                                       |                                                                                                                                                                                             | Synergistic                       |                         |
| nCdS+ nSiO <sub>2</sub> (with<br>no inclusions)                                  |                             |                                                                                                                                                                                       |                                                                                                                                                                                             | Synergistic                       |                         |
| nCdS + nSiO <sub>2</sub> (with<br>metal inclusions)                              |                             |                                                                                                                                                                                       |                                                                                                                                                                                             | Antagonistic                      |                         |

|                                                                                    |                              |                                                                                                                  |                                                    |              |                      |
|------------------------------------------------------------------------------------|------------------------------|------------------------------------------------------------------------------------------------------------------|----------------------------------------------------|--------------|----------------------|
| nTiO <sub>2</sub> (anatase) + nZnS                                                 |                              |                                                                                                                  |                                                    | Synergistic  |                      |
| nSiO <sub>2</sub> (with no inclusions) + nZnS                                      |                              |                                                                                                                  |                                                    | Synergistic  |                      |
| nSiO <sub>2</sub> (with metal inclusions) + nZnS                                   |                              |                                                                                                                  |                                                    | Antagonistic |                      |
| nSiO <sub>2</sub> (with no inclusions) + nTiO <sub>2</sub> (anatase)               |                              |                                                                                                                  |                                                    | Synergistic  |                      |
| nSiO <sub>2</sub> (with metal inclusions) + nTiO <sub>2</sub> (anatase)            |                              |                                                                                                                  |                                                    | Additive     |                      |
| nSiO <sub>2</sub> (with no inclusions) + nSiO <sub>2</sub> (with metal inclusions) |                              |                                                                                                                  |                                                    | Additive     |                      |
| nTiO <sub>2</sub> (Spherical, anatase@rutile) + nTiO <sub>2</sub> (Tubular)        | <i>Scenedesmus obliquus</i>  | nTiO <sub>2</sub> (Spherical, anatase@rutile) + nTiO <sub>2</sub> (Tubular):<br>2.33+13.16 and 19.75+211.26 mg/L | Growth inhibition and intracellular ROS generation | Additive     | Wang et al., 2020    |
|                                                                                    | <i>Chlorella pyrenoidosa</i> | nTiO <sub>2</sub> (Spherical, anatase@rutile) + nTiO <sub>2</sub> (Tubular): 0.13+0.002 and 5.38+4.87 mg/L       |                                                    | Additive     |                      |
|                                                                                    |                              |                                                                                                                  |                                                    | Synergistic  |                      |
| nCuO + nZnO                                                                        | <i>Scenedesmus obliquus</i>  | nCuO: 2.1 µg Cu/L-4.3 mg Cu/L<br>nZnO: 6.6 µg Zn/L-33.1 mg Zn/L<br>Mixtures: equal toxic ratio                   | Growth inhibition                                  | Additive     | Ye et al., 2017      |
| <b>Bacteria</b>                                                                    |                              |                                                                                                                  |                                                    |              |                      |
| nAg + nPt                                                                          | <i>Escherichia coli</i>      | nAg + nPt: 30+70, 50+50, and 70+30 wt%                                                                           | Antimicrobial activity                             | n.d.         | Breisch et al., 2020 |
|                                                                                    | <i>Staphylococcus aureus</i> |                                                                                                                  |                                                    |              |                      |
|                                                                                    | <i>Escherichia coli</i>      |                                                                                                                  |                                                    | Synergistic  | Chen et al., 2020    |

|                                                    |                              |                                                                                                                   |                                                                                                                          |                              |                            |
|----------------------------------------------------|------------------------------|-------------------------------------------------------------------------------------------------------------------|--------------------------------------------------------------------------------------------------------------------------|------------------------------|----------------------------|
| nCuO + nTiO <sub>2</sub><br>(anatase@rutile)       |                              | nCuO + nTiO <sub>2</sub> (anatase@rutile): 0.1+2, 0.2+2, 0.3+2, and 0.4+2 mg/L                                    | Bacterial ATP levels, cell membrane integrity, and ROS production                                                        | Slight additive              |                            |
| nAg + nCuO                                         | Nitrifying bacteria          | The concentration of each metallic/oxide nanoparticles was 1 mg/L                                                 | Nitrification inhibition and intracellular ROS concentrations                                                            | Additive                     | Choi and Hu, 2009          |
| nAg + nTiO <sub>2</sub><br>(anatase)               |                              |                                                                                                                   |                                                                                                                          | Additive                     |                            |
| nAg + nZnO                                         |                              |                                                                                                                   |                                                                                                                          | Antagonistic                 |                            |
| nAg + nCuO + nTiO <sub>2</sub> (anatase)           |                              |                                                                                                                   |                                                                                                                          | Additive                     |                            |
| nTiO <sub>2</sub> (anatase) + nZnO                 | <i>Escherichia coli</i>      | nTiO <sub>2</sub> (anatase): 1, 10, 100, and 1000 mg/L<br>nZnO: 1, 10, 100, and 1000 mg/L<br>Mixtures (1:1 ratio) | Growth reduction and cell wall damage                                                                                    | Antagonistic                 | Srivastava and Kumar, 2017 |
| nTiO <sub>2</sub><br>(anatase@rutile) + nZnO       | <i>Escherichia coli</i>      | nTiO <sub>2</sub> (anatase@rutile) + nZnO: 10+1 and 10+25 mg/L                                                    | ATP levels, cell membrane integrity, ROS production, and nanoparticle/bacterial surface interactions                     | Antagonistic                 | Tong et al., 2015          |
|                                                    | <i>Aeromonas hydrophila</i>  |                                                                                                                   |                                                                                                                          |                              |                            |
| nAg + nTiO <sub>2</sub><br>(anatase@rutile)        | <i>Escherichia coli</i>      | nAg: 5, 10, 20, 30, and 40 µg/L<br>nTiO <sub>2</sub> (anatase@rutile): 1 and 10 mg/L                              | ATP levels                                                                                                               | n.d.<br>(under dark)         | Wilke et al., 2016         |
| nAg + nTiO <sub>2</sub><br>(anatase@rutile)        | <i>Escherichia coli</i>      | nAg: 5, 10, 20, and 30 µg/L<br>nTiO <sub>2</sub> (anatase@rutile): 1 and 2 or 10 mg/L                             | ATP levels, cell membrane integrity, and ROS production                                                                  | Synergistic<br>(under light) | Wilke et al., 2018         |
| nCeO <sub>2</sub> + nZnO                           | <i>Nitrosomonas europaea</i> | nCeO <sub>2</sub> + nZnO: 1+10, 10+10, and 50+10 mg/L                                                             | Cell size, charge, morphology, density, membrane integrity, ammonia removal rate, amoA gene expression, and AMO activity | Synergistic                  | Yu et al., 2016a           |
| nCeO <sub>2</sub> + nTiO <sub>2</sub><br>(anatase) |                              | nCeO <sub>2</sub> + nTiO <sub>2</sub> (anatase): 50+1, 50+10, and 50+50 mg/L                                      |                                                                                                                          | Antagonistic                 |                            |

|                                                          |                              |                                                                                                                                                                                                                                                                                                                                                             |                                                                                                                              |                     |                      |
|----------------------------------------------------------|------------------------------|-------------------------------------------------------------------------------------------------------------------------------------------------------------------------------------------------------------------------------------------------------------------------------------------------------------------------------------------------------------|------------------------------------------------------------------------------------------------------------------------------|---------------------|----------------------|
| nTiO <sub>2</sub> (anatase) + nZnO                       | <i>Nitrosomonas europaea</i> | nTiO <sub>2</sub> (anatase) + nZnO: 1+10, 10+10, and 50+10 mg/L                                                                                                                                                                                                                                                                                             | Cell size, charge, morphology, density, membrane integrity, ammonia removal rate, AMO activity, and transcriptional response | Antagonistic        | Yu et al., 2016b     |
| nAg + nCu                                                | <i>Escherichia coli</i>      | 40 mL of nAg and 40 mL of nCu were separately synthesized in 3% (w/v) of chitosan and then mixed together                                                                                                                                                                                                                                                   | Bacterial growth inhibition                                                                                                  | n.d.                | Zain et al., 2014    |
|                                                          | <i>Bacillus subtilis</i>     |                                                                                                                                                                                                                                                                                                                                                             |                                                                                                                              |                     |                      |
| nCuO + nZn                                               | <i>Vibrio fischeri</i>       | nCu ( <i>EC</i> <sub>50</sub> ): 4.1 mg/L<br>nZn ( <i>EC</i> <sub>50</sub> ): 20.5 mg/L<br>nCuO ( <i>EC</i> <sub>50</sub> ): 118.7 mg/L<br>nZnO ( <i>EC</i> <sub>50</sub> ): 11.6 mg/L<br>Equitoxic binary mixtures of nanoparticles were prepared based on the <i>EC</i> <sub>50</sub> values of individual nanoparticles to determine their joint effects | Bioluminescence inhibition                                                                                                   | Synergistic         | Zhang et al., 2020   |
| nCuO + nZnO                                              |                              |                                                                                                                                                                                                                                                                                                                                                             |                                                                                                                              | Synergistic         |                      |
| nCu + nZn                                                |                              |                                                                                                                                                                                                                                                                                                                                                             |                                                                                                                              | Synergistic         |                      |
| nCu + nCuO                                               |                              |                                                                                                                                                                                                                                                                                                                                                             |                                                                                                                              | Antagonistic        |                      |
| nCu + nZnO                                               |                              |                                                                                                                                                                                                                                                                                                                                                             |                                                                                                                              | Antagonistic        |                      |
| nZn + nZnO                                               |                              |                                                                                                                                                                                                                                                                                                                                                             |                                                                                                                              | Additive            |                      |
| <b>Daphnia</b>                                           |                              |                                                                                                                                                                                                                                                                                                                                                             |                                                                                                                              |                     |                      |
| nAg + nZnO                                               | <i>Daphnia magna</i>         | nAg: 0.05 to 0.25 mg·Ag/L and nZnO: 0.5 to 1.3 mg·Zn/L for immobilization tests;<br>Combined exposures: based on a full factorial design<br>nAg: 0.095 to 0.5 mg·Ag/L and nZnO: 0.1 to 0.4 mg·Zn/L for reproduction tests; Combined exposures: a fixed ray design based on individual toxic units                                                           | Immobilization and reproduction                                                                                              | Synergistic         | Azevedo et al., 2017 |
|                                                          |                              |                                                                                                                                                                                                                                                                                                                                                             |                                                                                                                              | Antagonistic        |                      |
| nTiO <sub>2</sub> (anatase) + nTiO <sub>2</sub> (rutile) | <i>Ceriodaphnia dubia</i>    | nTiO <sub>2</sub> (anatase): 4.63, 9.26, 13.89, 18.52, 23.15, 27.78, and 32.41 mg/L                                                                                                                                                                                                                                                                         | Mortality and biouptake                                                                                                      | Antagonistic (under | Iswarya et al., 2016 |

|                                                          |                           |                                                                                                                                                                                                                           |                                                                                |                                                              |                      |
|----------------------------------------------------------|---------------------------|---------------------------------------------------------------------------------------------------------------------------------------------------------------------------------------------------------------------------|--------------------------------------------------------------------------------|--------------------------------------------------------------|----------------------|
|                                                          |                           | <p>nTiO<sub>2</sub> (rutile): 6, 12, 18, 24, 30, 36, and 42 mg/L</p> <p>Mixtures: equal toxic proportions</p>                                                                                                             |                                                                                | visible irradiation)                                         |                      |
|                                                          |                           | <p>nTiO<sub>2</sub> (anatase): 2.82, 5.64, 8.46, 11.28, 14.10, 16.92, and 19.74 mg/L</p> <p>nTiO<sub>2</sub> (rutile): 2.97, 5.94, 8.91, 11.88, 14.85, 17.82, and 20.79 mg/L</p> <p>Mixtures: equal toxic proportions</p> |                                                                                | Additive (under UV-A irradiation)                            |                      |
| nTiO <sub>2</sub> (anatase) + nTiO <sub>2</sub> (rutile) | <i>Ceriodaphnia dubia</i> | <p>Mixtures: 75, 300, and 1200 μM the mixtures treated algal diet</p> <p>In case of a binary mixture, the equal concentration of anatase and rutile nanoparticles forms the total concentration of binary mixture</p>     | Mortality, ultra-structural deformities, bioaccumulation, and biomagnification | Antagonistic (under visible irradiation)                     | Iswarya et al., 2018 |
|                                                          |                           |                                                                                                                                                                                                                           |                                                                                | Antagonistic (under UV-A irradiation)                        |                      |
| nTiO <sub>2</sub> (anatase) + nTiO <sub>2</sub> (rutile) | <i>Ceriodaphnia dubia</i> | <p>Mixtures: 75, 150, 300, 600, and 1200 μM the mixtures treated algal diet</p> <p>The binary mixture comprises an equal concentration of rutile and anatase nanoparticles</p>                                            | Mortality and oxidative stress (MDA, CAT, and GSH)                             | Synergistic (lower concentration, under visible irradiation) | Iswarya et al., 2019 |
|                                                          |                           |                                                                                                                                                                                                                           |                                                                                | Additive (higher concentration, under visible irradiation)   |                      |
|                                                          |                           |                                                                                                                                                                                                                           |                                                                                | Additive (lower concentration)                               |                      |

|                                                          |                        |                                                                                                                                                                     |                                                                                                                              |                                                             |                      |
|----------------------------------------------------------|------------------------|---------------------------------------------------------------------------------------------------------------------------------------------------------------------|------------------------------------------------------------------------------------------------------------------------------|-------------------------------------------------------------|----------------------|
|                                                          |                        |                                                                                                                                                                     |                                                                                                                              | n, under UV-A irradiation)                                  |                      |
|                                                          |                        |                                                                                                                                                                     |                                                                                                                              | Antagonistic (higher concentration, under UV-A irradiation) |                      |
| nAg + nZnO                                               | <i>Daphnia magna</i>   | nAg: 1-25 µg/L and nZnO: 0.25-5 mg/L                                                                                                                                | Immobilization and feeding inhibition                                                                                        | Synergistic                                                 | Lopes et al., 2016   |
| nCu + nCr                                                | <i>Daphnia magna</i>   | Joint toxicity of binary mixtures was determined at an equal concentration (1:1), and the total concentrations were 0.4, 2, 10, 50, and 100 µg/L                    | Reproduction and growth, rates of filtration and ingestion, as well as changes in enzyme activities: AChE, SOD, CAT, and GST | More-than-additive                                          | Lu et al., 2017      |
| nTiO <sub>2</sub> (anatase) + nTiO <sub>2</sub> (rutile) | <i>Daphnia similis</i> | 70:30 anatase: rutile ratio (w/w)<br>1 to 100 mg/L TiO <sub>2</sub>                                                                                                 | Immobilization                                                                                                               | n.d.                                                        | Marcone et al., 2012 |
| nCu + nZnO                                               | <i>Daphnia magna</i>   | nCu + nZnO: 0.11 mg Cu/L+1.29 mg Zn/L<br>nCu + nZnO: 0.40 mg Cu/L+4.01 mg Zn/L                                                                                      | Mortality and bioaccumulation                                                                                                | Additive<br>More-than-additive                              | Yu et al., 2022      |
| nCuO + nZnO                                              | <i>Daphnia magna</i>   | Binary mixtures were also tested according to an equiconcentration ratio of 1:1 and the total exposure concentrations were 0.0004, 0.002, 0.01, 0.05, and 0.25 mg/L | Immobilization, mortality, reproduction (fecundity) and growth, as well as filtration and ingestion rates                    | Synergistic<br>Partial additive                             | Zhao et al., 2012    |
| <b>Fish</b>                                              |                        |                                                                                                                                                                     |                                                                                                                              |                                                             |                      |
|                                                          | <i>Cyprinus carpio</i> |                                                                                                                                                                     |                                                                                                                              | Antagonistic                                                |                      |



|                                                              |                            |                                                                                                                                                                                           |                                                                                                                                                                     |                         |                               |
|--------------------------------------------------------------|----------------------------|-------------------------------------------------------------------------------------------------------------------------------------------------------------------------------------------|---------------------------------------------------------------------------------------------------------------------------------------------------------------------|-------------------------|-------------------------------|
| nAg + nTiO <sub>2</sub><br>(anatase@rutile)                  |                            | nAg: 0.05, 0.10, 0.20, 0.30, 0.40, 0.50, 0.60, and 0.70 mg/L for acute toxicity tests and nAg: 0.05 and 0.1 mg/L for chronic toxicity tests<br>nTiO <sub>2</sub> (anatase@rutile): 1 mg/L | Mortality, bioaccumulation, oxidative stress (SOD, CAT, and GST), and gill histopathology                                                                           | Synergistic<br>Additive | Haghighat et al., 2021        |
| nCu + nZnO                                                   | <i>Poeciliopsis lucida</i> | nCu: 0.39, 0.78, 1.56, 3.13, 6.25, 12.5, and 25 µg/mL<br>nZnO: 6.25 µg/mL                                                                                                                 | Cell viability, cell morphology, and metal internalization                                                                                                          | n.d.                    | Hernández-Moreno et al., 2016 |
| nCu + nZnO                                                   | <i>Oncorhynchus mykiss</i> | nCu: 0.0425, 0.085, 0.17, and 0.34 mg/L<br>nZnO: 1.25 mg/L                                                                                                                                | Survival, metal internalization, and oxidative stress (EROD activity, GST activity, and GSH/GSSG ratio)                                                             | n.d.                    | Hernández-Moreno et al., 2019 |
| nTiO <sub>2</sub> (spherical, anatase) + nZnO (stick-shaped) | <i>Danio rerio</i>         | nTiO <sub>2</sub> (spherical, anatase): 1.5, 3, 6, 12, and 24 mg Ti/L<br>nZnO: 2, 4, 8, 16, and 32 mg Zn/L                                                                                | Mortality and hatching rate                                                                                                                                         | Antagonistic            | Hua et al., 2016              |
| nCeO <sub>2</sub> + nCuO                                     | Zebrafish embryos          | nCeO <sub>2</sub> : 0.01, 0.1, 1, 10, and 50 µg/mL<br>nCuO: 0.01, 0.1, 1, 10, and 50 µg/mL<br>Mixtures (1:1 ratio)                                                                        | Mortality rate, hatching rate, malformations, oxidative stress genes, CAT enzyme activity, DNA damage, and apoptosis and necrosis                                   | n.d.                    | Kaur et al., 2019             |
| nCuO + nTiO <sub>2</sub><br>(anatase@rutile)                 | <i>Cyprinus carpio</i>     | nCuO + nTiO <sub>2</sub> (anatase@rutile): 2.5+10 and 5.0+10 mg/L                                                                                                                         | Oxidative stress biomarkers in the liver, brain, and gills and acetylcholinesterase activity (a biomarker that indicates neurotoxicity) in the brain and muscle, as | n.d.                    | Mansouri et al., 2016         |

|                                           |                             |                                                                                                                                 |                                                                                                                                                                              |              |                       |
|-------------------------------------------|-----------------------------|---------------------------------------------------------------------------------------------------------------------------------|------------------------------------------------------------------------------------------------------------------------------------------------------------------------------|--------------|-----------------------|
|                                           |                             |                                                                                                                                 | well as induce histopathological alterations in the gills, liver and retina                                                                                                  |              |                       |
| nCuO + nTiO <sub>2</sub> (anatase@rutile) | <i>Cyprinus carpio</i>      | nCuO + nTiO <sub>2</sub> (anatase@rutile): 2.5+10 and 5.0+10 mg/L                                                               | Histopathological anomalies of gill and intestine tissues in <i>C. carpio</i>                                                                                                | Synergistic  | Mansouri et al., 2017 |
| nTiO <sub>2</sub> + nZnO                  | <i>Prochilodus lineatus</i> | nTiO <sub>2</sub> + nZnO: 1+1 µg/L                                                                                              | Biochemical responses (AChE activity, protein carbonylation, lipid peroxidation, and non-protein thiols) and injuries in organs (histological and ultra-structural analyses) | n.d.         | Miranda et al., 2016  |
| nAg + nCuO                                | <i>Clarias gariepinus</i>   | nCuO: 6.25, 12.5, 25, 50, and 100 mg/L<br>nAg: 6.25, 12.5, 25, 50, and 100 mg/L<br>Mixtures (1:1 ratio)                         | Frequency of micronucleus, haematology, histopathology (skin, gills and liver), and hepatic oxidative stress analysis (MDA, reduced GSH, SOD, and CAT)                       | Antagonistic | Ogunsuyi et al., 2019 |
|                                           |                             |                                                                                                                                 |                                                                                                                                                                              | Synergistic  |                       |
| nCuO + nCeO <sub>2</sub>                  | <i>Carassius auratus</i>    | 20, 40, 80, 160, and 320 mg/L. The binary and ternary mixtures were tested at an equi-concentration ratio of 1:1 or 1:1:1 (W/V) | AChE activity, Na <sup>+</sup> /K <sup>+</sup> -ATPase activity, SOD activity, and CAT activity                                                                              | Antagonistic | Xia et al., 2013      |
| nCuO + nZnO                               |                             |                                                                                                                                 |                                                                                                                                                                              | Synergistic  |                       |
| nCeO <sub>2</sub> + nZnO                  |                             |                                                                                                                                 |                                                                                                                                                                              | Antagonistic |                       |
| nCeO <sub>2</sub> + nCuO + nZnO           |                             |                                                                                                                                 |                                                                                                                                                                              | Additive     |                       |
| <b>Fungi</b>                              |                             |                                                                                                                                 |                                                                                                                                                                              |              |                       |

|                                                         |                                 |                                                                                                                                     |                                                                                                                                                                                            |              |                        |
|---------------------------------------------------------|---------------------------------|-------------------------------------------------------------------------------------------------------------------------------------|--------------------------------------------------------------------------------------------------------------------------------------------------------------------------------------------|--------------|------------------------|
| nAg + nMoS <sub>2</sub><br>(chitosan functionalization) | <i>Saccharomyces cerevisiae</i> | nAg: 5, 10, 20, 30, and 40 µg/L<br>nMoS <sub>2</sub> (chitosan functionalization): 1 and 10 mg/L                                    | Oxidative stress (intracellular ROS generation), membrane stress (intracellular lactate dehydrogenase activity), and metabolic activities                                                  | Synergistic  | Yang et al., 2018      |
| <b>Insects</b>                                          |                                 |                                                                                                                                     |                                                                                                                                                                                            |              |                        |
| nCdO + nPbO                                             | <i>Apis mellifera</i>           | nCdO: 0.01 mg/mL<br>nPbO: 0.65 mg/mL                                                                                                | Content of nCdO and nPbO in midgut tissues, survival, morphological assessment of midgut tissues, ultrastructure observations, and incidence of apoptosis and necrosis of midgut epithelia | Antagonistic | Dabour et al., 2019    |
| nZn + nCu                                               | <i>Folsomia candida</i>         | nZn: nCu: 300+300 mg/kg                                                                                                             | Survival and reproduction                                                                                                                                                                  | Antagonistic | Joško et al., 2022     |
| nZnO + nCuO                                             |                                 | nZnO: nCuO: 300+300 mg/kg                                                                                                           |                                                                                                                                                                                            | Synergistic  |                        |
| <b>Plants</b>                                           |                                 |                                                                                                                                     |                                                                                                                                                                                            |              |                        |
| nCo + nFe + nNi                                         | <i>Lactuca sativa</i>           | Influent: 2,700 mg nCo + 50,000 mg nFe + 6,250 mg nNi; DI Water 123 kg                                                              | Germination and growth                                                                                                                                                                     | n.d.         | Hassanein et al., 2021 |
| nTiO <sub>2</sub> (anatase) + nZnO                      | <i>Vigna angularis</i>          | nTiO <sub>2</sub> (anatase): 20, 40, 60, 80, 100, and 200 µg/mL<br>nZnO: 20, 40, 60, 80, 100, and 200 µg/mL<br>Mixtures (1:1 ratio) | Seed germination, root/shoot length, total chlorophyll content, carotenoids and lipid peroxidation, oxidative stress and antioxidant enzyme activity, kinetic uptake and transport         | n.d.         | Jahan et al., 2018     |
| nCuO + nZnO                                             | <i>Hordeum vulgare</i>          | nCuO: 300 mg Cu/kg                                                                                                                  | Biomass, plant mineral                                                                                                                                                                     | n.d.         | Joško et al., 2021     |

|                                                                                                                                                                                                                                             |                                                                                                             |                                                                                                                                                                     |                                                                                                                                                  |              |                        |
|---------------------------------------------------------------------------------------------------------------------------------------------------------------------------------------------------------------------------------------------|-------------------------------------------------------------------------------------------------------------|---------------------------------------------------------------------------------------------------------------------------------------------------------------------|--------------------------------------------------------------------------------------------------------------------------------------------------|--------------|------------------------|
|                                                                                                                                                                                                                                             |                                                                                                             | nZnO: 300 mg Zn/kg<br>Mixtures (1:1 ratio)                                                                                                                          | composition as well as expression of genes regulating metal homeostasis (ZIP1,3,6,8,10,14, RAN1, PAA1,2, MTP1, COPT5) and detoxification (MT1–3) |              |                        |
| nCuO + nZnO<br>nCuO + nTiO <sub>2</sub><br>nCuO + nCr <sub>2</sub> O <sub>3</sub><br>nCuO + nFe <sub>2</sub> O <sub>3</sub><br>nZnO + nTiO <sub>2</sub><br>nZnO + nCr <sub>2</sub> O <sub>3</sub><br>nZnO + nFe <sub>2</sub> O <sub>3</sub> | <i>Lepidium sativum</i><br><i>Linum usitatissimum</i><br><i>Cucumis sativus</i><br><i>Triticum aestivum</i> | Concentration of each nanoparticles was set to be 100 mg/L<br>Mixtures (1:1 ratio)                                                                                  | Seed germination, root growth inhibition rates, and the external and internal surface area of root                                               | Antagonistic | Joško et al., 2017     |
| nCdO + nCuO                                                                                                                                                                                                                                 | <i>Vigna radiata</i>                                                                                        | 0.1, 1, and 10 mg/L<br>Mixtures (1:1 ratio)                                                                                                                         | Germination percent, relative germination rate, and metal accumulations                                                                          | n.d.         | Jung et al., 2020      |
| nCuO + nZnO<br>nCuO + nNiO<br>nZnO + nNiO                                                                                                                                                                                                   | <i>Lactuca sativa</i><br><i>Raphanus sativus</i>                                                            | nCuO: 0.06 and 0.12 mg/L<br>nZnO: 0.12 and 0.25 mg/L<br>nNiO: 0.15 and 0.3 mg/L<br>nCuO: 0.09 and 0.18 mg/L<br>nZnO: 0.31 and 0.62 mg/L<br>nNiO: 0.71 and 1.42 mg/L | Root and shoot growth                                                                                                                            | Additive     | Kong et al., 2021      |
| nCu + nZnO                                                                                                                                                                                                                                  | <i>Lactuca sativa</i>                                                                                       | nCu: 0.10 to 0.80 mg/L<br>nZnO: 0.50 to 50.00 mg/L                                                                                                                  | Relative root elongation rate                                                                                                                    | Antagonistic | Liu et al., 2016       |
| nTiO <sub>2</sub> (anatase) + nTiO <sub>2</sub> (rutile)                                                                                                                                                                                    | <i>Pisum sativum</i>                                                                                        | 800 mg of TiO <sub>2</sub> per kg of soil<br>Mixture of anatase and rutile nTiO <sub>2</sub> : 1:1 ratio                                                            | TiO <sub>2</sub> particles' entry in the root system,                                                                                            | n.d.         | Muccifora et al., 2021 |

|                                                  |                          |                                                                                                                                                               |                                                                                                                                                                                |              |                        |
|--------------------------------------------------|--------------------------|---------------------------------------------------------------------------------------------------------------------------------------------------------------|--------------------------------------------------------------------------------------------------------------------------------------------------------------------------------|--------------|------------------------|
|                                                  |                          |                                                                                                                                                               | bioaccumulation, relative distribution, and localization, as well as the main crystalline form preferentially absorbed and their effect in cells ultrastructure of plant roots |              |                        |
| nCuO + nZnO                                      | <i>Spinacia oleracea</i> | nCuO: 10, 100, and 1000 mg/L<br>nZnO: 10, 100, and 1000 mg/L<br>Mixtures (1:1 ratio)                                                                          | Root length, shoot length, total weight, chlorophyll content, carotenoid content, and ion content of <i>S. oleracea</i> plants                                                 | n.d.         | Singh and Kumar, 2016  |
| nCuO + nZnO                                      | <i>Raphanus sativus</i>  | nCuO: 10, 100, and 1000 mg/kg<br>nZnO: 10, 100, and 1000 mg/kg<br>Mixtures (1:1 ratio)                                                                        | Seed germination (root length, shoot length, and fresh weight) and metal uptake                                                                                                | Antagonistic | Singh and Kumar, 2018  |
| nCuO + nZnO                                      | <i>Raphanus sativus</i>  | nCuO: 0.1, 1, 10, 100, and 1000 mg/L<br>nZnO: 0.1, 1, 10, 100, and 1000 mg/L<br>Mixtures (1:1 ratio)                                                          | Seed germination (root length, shoot length, and fresh weight) and metal uptake                                                                                                | Antagonistic | Singh and Kumar, 2019  |
| nCuO + nZnO                                      | <i>Spinacia oleracea</i> | nCuO + nZnO: $1.2 \times 10^{-4} + 1.2 \times 10^{-4}$ , $1.2 \times 10^{-3} + 1.2 \times 10^{-3}$ , $1.2 \times 10^{-2} + 1.2 \times 10^{-2}$ mol/kg of soil | Maturity, plant fresh weight, root length, and metal uptake                                                                                                                    | Additive     | Singh and Kumar, 2020a |
| nAg <sub>2</sub> O + nTiO <sub>2</sub> (anatase) | <i>Spinacia oleracea</i> | nAg <sub>2</sub> O: 1 and 10 mg/kg<br>nTiO <sub>2</sub> (anatase): 1 and 10 mg/kg<br>Mixtures (1:1 ratio)                                                     | Plant physiology and development (root length, shoot length, and fresh weight), total chlorophyll and carotenoid contents, and metal uptake                                    | Additive     | Singh and Kumar, 2020b |

|                          |                      |                                                                      |                                                                                                                                                                                                                                                                                                                                                                                                                            |              |                             |
|--------------------------|----------------------|----------------------------------------------------------------------|----------------------------------------------------------------------------------------------------------------------------------------------------------------------------------------------------------------------------------------------------------------------------------------------------------------------------------------------------------------------------------------------------------------------------|--------------|-----------------------------|
| nCeO <sub>2</sub> + nZnO | <i>Pisum sativum</i> | Ce: 100 and 200 mg/L<br>Zn: 100 and 200 mg/L<br>Mixtures (1:1 ratio) | Plant growth (root and stem lengths and fresh weight), Ce and Zn concentrations in roots and shoots, photosynthesis pigments (contents of chlorophyll a, chlorophyll b, and carotenoids), and photosynthetic parameters (leaf net photosynthesis, sub-stomatal CO <sub>2</sub> concentration, transpiration, stomatal conductance, photosynthetic water use efficiency, and photosynthetic CO <sub>2</sub> response curve) | n.d.         | Skiba et al., 2021          |
| nCdO + nCuO              | <i>Vigna radiata</i> | nCdO + nCuO: 1+1, 10+10, and 100+100 mg/kg                           | Seed germination, plant growth, and metal accumulation                                                                                                                                                                                                                                                                                                                                                                     | Antagonistic | Subpiramaniyan et al., 2021 |

<sup>a</sup> N.d. = not determined. AChE – acetylcholinesterase, AMO – ammonia monooxygenase, ATP – adenosine triphosphate, ATPase – adenosine triphosphatase, CAT – catalase, COX – cyclooxygenase, EROD – ethoxyresorufin-O-deethylase, GSH – glutathione, GSSG – oxidized glutathione, GST – glutathione S-transferase, LPO – lipid peroxidation, MDA malondialdehyde, nMoS<sub>2</sub> – molybdenum disulfide nanosheets, ROS – reactive oxygen species, SOD – superoxide dismutase.

For presentation purposes, nSiO<sub>2</sub> (with metal inclusions) is shortened to nSiO<sub>2</sub>(m), nTiO<sub>2</sub> (anatase) is shortened to nTiO<sub>2</sub>(a), nTiO<sub>2</sub> (anatase@rutile) is shortened to nTiO<sub>2</sub>(a@r), nTiO<sub>2</sub> (rutile) is shortened to nTiO<sub>2</sub>(r).

**Table S2.** List of studies on the joint toxicological effects of multiple engineered nanoparticles (ENPs) comprising of nonmetal-based components on ecological species <sup>a</sup>

| ENPs<br>Types of mixtures                   | Ecological species             | Test concentrations                                                          | Toxicity endpoints                                                                                                                                                                                  | Types of joint interactions                              | References           |
|---------------------------------------------|--------------------------------|------------------------------------------------------------------------------|-----------------------------------------------------------------------------------------------------------------------------------------------------------------------------------------------------|----------------------------------------------------------|----------------------|
| nPS + nTiO <sub>2</sub><br>(anatase@rutile) | <i>Scenedesmus obliquus</i>    | nPS: 1 mg/L<br>nTiO <sub>2</sub> (anatase@rutile): 0.025, 0.25, and 2.5 mg/L | Cell viability, morphological changes, oxidative stress (total ROS, superoxide radical, hydroxyl radical), antioxidant activity, photosynthetic efficiency, and esterase activity                   | Antagonistic                                             | Das et al., 2022     |
|                                             |                                |                                                                              |                                                                                                                                                                                                     | Additive                                                 |                      |
| nPS + nZnO                                  | <i>Ctenopharyngodon idella</i> | nPS: 760 µg/L<br>nZnO: 760 µg/L                                              | Behavioral, biochemical (nitric oxide dosage, TBARS, hydrogen peroxide, total glutathione content, DPPH radicals' scavenging, SOD, and AChE activity, nutritional status), and genotoxic biomarkers | No observed antagonistic, synergistic or additive effect | Estrela et al., 2021 |
| MWCNTs + nCuO                               | <i>Tetrademus obliquus</i>     | MWCNTs: 1, 10, and 100 mg/L<br>nCuO: 2 and 200 mg/L                          | Growth inhibition, membrane damage, physical damage, oxidative stress (ROS level, SOD, and MDA), and internalization of Cu                                                                          | n.d.                                                     | Fang et al., 2022    |
| nSe + nZnO                                  | Zebra fish ( <i>D. rerio</i> ) | nSe + nZnO (2 mg/kg each)                                                    | Survivability, growth performance parameters, intracellular ROS, gene expression, and fecundity and development                                                                                     | Synergetic                                               | Fasil et al., 2021   |

|                                                              |                                  |                                                                                                                                                               |                                                                                                                                                                                                                                     |              |                        |
|--------------------------------------------------------------|----------------------------------|---------------------------------------------------------------------------------------------------------------------------------------------------------------|-------------------------------------------------------------------------------------------------------------------------------------------------------------------------------------------------------------------------------------|--------------|------------------------|
| MWCNTs + nZnO                                                | <i>Brassica rapa</i>             | MWCNTs: 10 and 100 mg/L<br>nZnO: 10, 50, and 100 mg/L                                                                                                         | The length of roots and stems, chlorophyll content, oxidative stress (relative ROS, soluble sugar, and MDA contents), antioxidant enzyme activity (CAT, POD, and SOD), metal element content, and root scanning electron microscopy | Synergetic   | Hong et al., 2022      |
| nPS + nAg                                                    | <i>Chlamydomonas reinhardtii</i> | nAg: 3, 10, 30, 100, and 200 µg/L<br>nPS: 3 and 30 mg C/L                                                                                                     | Cell-specific growth rate and subcellular distributions                                                                                                                                                                             | Synergistic  | Huang et al., 2019     |
|                                                              | <i>Ochromonas danica</i>         | nAg: 10, 30, 100, 200, and 300 µg/L<br>nPS: 3 and 30 mg C/L                                                                                                   |                                                                                                                                                                                                                                     |              |                        |
| nPS + nTiO <sub>2</sub><br>(anatase@rutile)                  | <i>Chlorella</i> sp.             | nPS, COOH-nPS, and NH <sub>2</sub> -nPS: 5 mg/L<br>nTiO <sub>2</sub> (anatase@rutile): 0.25, 0.5, and 1 mg/L                                                  | Cell viability, oxidative stress (total ROS, superoxide and hydroxyl radical, CAT and SOD, and MDA), maximum quantum yield of PS II, and esterase activity                                                                          | Antagonistic | Natarajan et al., 2022 |
| COOH-nPS + nTiO <sub>2</sub><br>(anatase@rutile)             |                                  |                                                                                                                                                               |                                                                                                                                                                                                                                     |              |                        |
| NH <sub>2</sub> -nPS + nTiO <sub>2</sub><br>(anatase@rutile) |                                  |                                                                                                                                                               |                                                                                                                                                                                                                                     |              |                        |
| GNs + nZnO                                                   | <i>Capoeta fusca</i>             | GNs + nZnO: 6.5+0.04 and 6.5+0.09 mg/L                                                                                                                        | Bioconcentration (uptake and elimination)                                                                                                                                                                                           | n.d.         | Sayadi et al., 2021    |
| MLGs + nZnO                                                  | <i>Capoeta fusca</i>             | MLGs: 6.5 mg/L<br>nZnO: 0.1, 0.4, 0.9, 1, 5, 10, 15, 20, 25, and 30 mg/L for acute toxicity test and nZnO: 0.09 mg/L for behavioural assay and histopathology | Lethality, histopathological and behavioral changes                                                                                                                                                                                 | Synergistic  | Sayadi et al., 2022    |
|                                                              |                                  |                                                                                                                                                               |                                                                                                                                                                                                                                     | Antagonistic |                        |
| GO + nZnO                                                    | <i>Scenedesmus obliquus</i>      | GO: 0.5-50 mg/L<br>nZnO: 0.01-50 mg/L<br>Mixture ratios: EC <sub>10</sub> and EC <sub>50</sub> of each component                                              | Growth inhibition rate and total ROS level                                                                                                                                                                                          | Additive     | Ye et al., 2018        |



|                         |                               |                                                                                                                                            |                                                                                                                                                                                                          |              |                    |
|-------------------------|-------------------------------|--------------------------------------------------------------------------------------------------------------------------------------------|----------------------------------------------------------------------------------------------------------------------------------------------------------------------------------------------------------|--------------|--------------------|
|                         | <i>Daphnia magna</i>          | GO: 1-80 mg/L<br>nZnO: 0.01-0.4 mg/L<br>Mixture ratios: $EC_{10}$ and $EC_{50}$ of each component                                          | Immobilization rate and total ROS level                                                                                                                                                                  | Additive     |                    |
|                         | <i>Danio rerio</i>            | GO: 20-160 mg/L<br>nZnO: 2-20 mg/L<br>Mixture ratios: $LC_{10}$ and $LC_{50}$ of each component                                            | Lethality and total ROS level                                                                                                                                                                            | Antagonistic |                    |
| CNCs + nZnO             | <i>Eremosphaera viridis</i>   | CNCs: 100 mg/L<br>nZnO: 1, 5, and 10 mg/L                                                                                                  | Dry weight, chlorophyll a, chlorophyll b, ROS level, CAT activity, MDA content, cellular superficial- and ultra-structures, elemental distribution as well as proteins and lipids in a single algal cell | n.d.         | Yin et al., 2022   |
| GNs + nZrO <sub>2</sub> | <i>Chlorella pyrenoidosa</i>  | GNs: 0.1 and 1 mg/L<br>nZrO <sub>2</sub> : 1, 5, 10, 17.5, 25, and 50 mg/L<br>GNs + nZrO <sub>2</sub> : 1+ $EC_{10}$ and 1+ $EC_{50}$ mg/L | Growth inhibition, intracellular levels of ROS, mitochondrial membrane potential, permeability of cell membrane, and cellular superficial- and ultra-structures                                          | Synergistic  | Wang et al., 2021  |
| rGO + nZrO <sub>2</sub> |                               | rGO: 0.1 and 1 mg/L<br>nZrO <sub>2</sub> : 1, 5, 10, 17.5, 25, and 50 mg/L<br>rGO + nZrO <sub>2</sub> : 1+ $EC_{10}$ and 1+ $EC_{50}$ mg/L |                                                                                                                                                                                                          | Synergistic  |                    |
| MWCNTs + nPS            | <i>Microcystis aeruginosa</i> | MWCNTs: 5, 10, 20, and 50 mg/L<br>nPS: 5, 10, 20, and 50 mg/L                                                                              | Growth (cell density), photosynthesis (chlorophyll a), total protein, antioxidant responses (SOD and MDA), membrane damage, genetic material damage, and metabolic process                               | Antagonistic | Zhang et al., 2022 |

|                                      |                              |                                                                                       |                                                                                                                                                            |              |                   |
|--------------------------------------|------------------------------|---------------------------------------------------------------------------------------|------------------------------------------------------------------------------------------------------------------------------------------------------------|--------------|-------------------|
| GO + nAl <sub>2</sub> O <sub>3</sub> | <i>Chlorella pyrenoidosa</i> | GO: 25 mg/L<br>nAl <sub>2</sub> O <sub>3</sub> : 50, 100, 150, 300, 450, and 600 mg/L | Growth inhibition, membrane damage, oxidative stress, and physical damage                                                                                  | n.d.         | Zhao et al., 2018 |
| GQDs + nZnO                          | <i>Gymnodinium</i>           | GQDs + nZnO: 1+1, 20+5, and 20+20 mg/L                                                | Cell density, specific growth rates, total intracellular ROS, enzyme activities (SOD and ATPase), and surface interaction of nanoparticles and algal cells | Antagonistic | Zhu et al., 2022  |

<sup>a</sup> N.d. = not determined. AChE – acetylcholinesterase, ATPase – adenosine triphosphatase, CNCs – cellulose nanocrystals, COOH-nPS – carboxyl-functionalized polystyrene nanoplastics, DPPH – diphenyl-1-picrylhydrazyl, EC<sub>10</sub> – 10% effect concentration, EC<sub>50</sub> – 50% effect concentration, GNs – graphene nanosheets, GO – graphene oxide, GQDs – graphene quantum dots, LC<sub>10</sub> – 10% lethal concentration, LC<sub>50</sub> – 50% lethal concentration, MDA – malondialdehyde, MLGs – multi-layer graphenes, MWCNTs – multiwall carbon nanotubes, NH<sub>2</sub>-nPS – amine-functionalized polystyrene nanoplastics, POD – peroxidase, nPS – polystyrene nanoplastics, rGO – reduced graphene oxide, nSe – nano-selenium, SOD – superoxide dismutase, SWCNTs – single walled carbon nanotubes, TBARS – thiobarbituric acid reactive species.

For presentation purposes, nTiO<sub>2</sub> (anatase@rutile) is shortened to nTiO<sub>2</sub>(a@r).

**Table S3.** List of studies on the potentiation or attenuation of effects of mixtures of individual engineered nanoparticles (ENPs) on ecological species <sup>a</sup>

| ENPs<br>Types of mixtures                   | Ecological species           | Potentiation or attenuation of effects                                                                                                                |   | References                    |
|---------------------------------------------|------------------------------|-------------------------------------------------------------------------------------------------------------------------------------------------------|---|-------------------------------|
| nAg + nPt                                   | <i>Escherichia coli</i>      | nPt significantly increased the toxicity of nAg                                                                                                       | ↑ | Breisch et al., 2020          |
|                                             | <i>Staphylococcus aureus</i> |                                                                                                                                                       |   |                               |
| MWCNTs + nCuO                               | <i>Tetradesmus obliquus</i>  | The existence of nCuO in some groups reduced cell membrane damage caused by MWCNTs                                                                    | ↓ | Fang et al., 2022             |
|                                             |                              | The highest concentration of nCuO combined with the highest concentration of MWCNTs enhanced the induced ROS level                                    | ↑ |                               |
| nAg + nTiO <sub>2</sub><br>(anatase@rutile) | <i>Cyprinus carpio</i>       | nTiO <sub>2</sub> increased acute toxicity of nAg                                                                                                     | ↑ | Haghighat et al., 2021        |
|                                             |                              | nTiO <sub>2</sub> increased Ag accumulation in liver and intestine                                                                                    | ↑ |                               |
|                                             |                              | nTiO <sub>2</sub> decreased Ag accumulation in gills                                                                                                  | ↓ |                               |
|                                             |                              | nTiO <sub>2</sub> somewhat mitigated the effects of nAg on antioxidant enzymes activities                                                             | ↓ |                               |
| nCu + nZnO                                  | <i>Poeciliopsis lucida</i>   | The cytotoxicity exerted by nCu was enhanced in presence of non-toxic concentrations of nZnO                                                          | ↑ | Hernández-Moreno et al., 2016 |
| nCu + nZnO                                  | <i>Oncorhynchus mykiss</i>   | The co-exposure of rainbow trout to non-toxic concentrations of nCu and a fixed non-toxic concentration of nZnO resulted in lethal effects            | ↑ | Hernández-Moreno et al., 2019 |
| nTiO <sub>2</sub> (anatase) + nZnO          | <i>Vigna angularis</i>       | The combination led to attenuated uptake and translocation behavior                                                                                   | ↓ | Jahan et al., 2018            |
| nCuO + nZnO                                 | <i>Hordeum vulgare</i>       | After combined treatment of ENPs, the extractable concentrations of Cu and Zn were lower than upon individual exposure in bulk soil                   | ↓ | Joško et al., 2021            |
|                                             |                              | Genes related to metal uptake (ZIP) and cellular compartment (PAA2, RAN1) were mostly up-regulated by single rather than combined application of ENPs | ↓ |                               |
| nCdO + nCuO                                 | <i>Vigna radiata</i>         | The germination rate of the nCdO + nCuO treatment was less than that of the single metal exposure under both humidities (70% and 80%) at 48 h         | ↓ | Jung et al., 2020             |

|                                                      |                                 |                                                                                                                                                                                                                                                                           |    |                       |
|------------------------------------------------------|---------------------------------|---------------------------------------------------------------------------------------------------------------------------------------------------------------------------------------------------------------------------------------------------------------------------|----|-----------------------|
| nCuO + nCeO <sub>2</sub>                             | Zebrafish embryos               | The harmful effects of the mixtures were more than nCeO <sub>2</sub> and less than that of nCuO                                                                                                                                                                           | ↑↓ | Kaur et al., 2019     |
| nCuO + nTiO <sub>2</sub> (anatase@rutile)            | <i>Cyprinus carpio</i>          | The joint presence of nTiO <sub>2</sub> can potentially increase the uptake of nCuO in the tissues of carp                                                                                                                                                                | ↑  | Mansouri et al., 2016 |
| nCeO <sub>2</sub> + nZnO                             | <i>Pisum sativum</i>            | The effects of nZnO were decreased by nCeO <sub>2</sub>                                                                                                                                                                                                                   | ↓  | Skiba et al., 2021    |
| GNs + nZnO                                           | <i>Capoeta fusca</i>            | The presence of GNs reduced the bioavailability of nZnO                                                                                                                                                                                                                   | ↓  | Sayadi et al., 2021   |
| nAg + nTiO <sub>2</sub> (anatase@rutile)             | <i>Escherichia coli</i>         | nTiO <sub>2</sub> attenuated the toxicity of nAg                                                                                                                                                                                                                          | ↓  | Wilke et al., 2016    |
| nAg + nMoS <sub>2</sub> (chitosan functionalization) | <i>Saccharomyces cerevisiae</i> | nMoS <sub>2</sub> attenuated the oxidative stress induced by nAg on the yeast cells                                                                                                                                                                                       | ↓  | Yang et al., 2018     |
|                                                      |                                 | nAg inhibited the metabolic activities in yeast cells, but this inhibition phenomenon could be alleviated by nMoS <sub>2</sub>                                                                                                                                            | ↓  |                       |
| CNCs + nZnO                                          | <i>Eremosphaera viridis</i>     | The addition of CNCs enhanced the bioavailability and toxicity of nZnO to the algae                                                                                                                                                                                       | ↑  | Yin et al., 2022      |
|                                                      |                                 | The nZnO-CNC association enhanced the envelopment of the algal cells and exerted strong oxidative stress as compared to bare nZnO                                                                                                                                         | ↑  |                       |
| GO + nAl <sub>2</sub> O <sub>3</sub>                 | <i>Chlorella pyrenoidosa</i>    | Algal growth inhibition by GO with coexisting nAl <sub>2</sub> O <sub>3</sub> particles was much lower than the sum of inhibitions from the individual materials for nAl <sub>2</sub> O <sub>3</sub> , showing the toxicity mitigation by nAl <sub>2</sub> O <sub>3</sub> | ↓  | Zhao et al., 2018     |
|                                                      |                                 | GO-induced algal membrane damage was suppressed by the nAl <sub>2</sub> O <sub>3</sub>                                                                                                                                                                                    | ↓  |                       |

“↑ indicates the potentiation of effect of mixtures of individual ENPs and ↓ indicates the attenuation of effect of mixtures of individual ENPs. CNCs – cellulose nanocrystals, GNs – graphene nanosheets, GO – graphene oxide, MWCNTs – multiwall carbon nanotubes. For presentation purposes, nTiO<sub>2</sub> (anatase) is shortened to nTiO<sub>2</sub>(a), nTiO<sub>2</sub> (anatase@rutile) is shortened to nTiO<sub>2</sub>(a@r).

**Table S4.** List of studies on the toxicological effects of multicomponent nanomaterials (NMs) on ecological species <sup>a</sup>

| Types of hybrid NMs                                                        | Ecological species           | Toxicity endpoints                                                         | Minimum inhibitory concentration | Toxic effects                                                                                                                                                                                                                                 | References               |
|----------------------------------------------------------------------------|------------------------------|----------------------------------------------------------------------------|----------------------------------|-----------------------------------------------------------------------------------------------------------------------------------------------------------------------------------------------------------------------------------------------|--------------------------|
| nAg@nZnO                                                                   | <i>Daphnia magna</i>         | Immobilization and reproduction                                            | n.d.                             | nAg@nZnO hybrid NMs showed higher toxicity than predicted based on the toxicity of nAg and nZnO                                                                                                                                               | Azevedo et al., 2017     |
| GO@nZnO                                                                    | <i>Escherichia coli</i>      | Growth of bacteria                                                         | n.d.                             | The antibacterial activity of GO@nZnO nanorods hybrid NMs has been demonstrated                                                                                                                                                               | Bhaisare et al., 2016    |
|                                                                            | <i>Staphylococcus aureus</i> |                                                                            |                                  |                                                                                                                                                                                                                                               |                          |
| $\alpha$ -nFe <sub>2</sub> O <sub>3</sub> @nCo <sub>3</sub> O <sub>4</sub> | <i>B. subtilis</i>           | Bacterial growth inhibition                                                | 90 mg/dL                         | The enhanced bactericidal activity of the $\alpha$ -nFe <sub>2</sub> O <sub>3</sub> @nCo <sub>3</sub> O <sub>4</sub> nanocomposite was the result of synergistic effects of iron oxide and cobalt oxide nanoparticles                         | Bhushan et al., 2018     |
|                                                                            | <i>S. aureus</i>             |                                                                            | 75 mg/dL                         |                                                                                                                                                                                                                                               |                          |
|                                                                            | <i>E. coli</i>               |                                                                            | 60 mg/dL                         |                                                                                                                                                                                                                                               |                          |
|                                                                            | <i>S. typhi</i>              |                                                                            | 45 mg/dL                         |                                                                                                                                                                                                                                               |                          |
| GO@nAg                                                                     | <i>Fusarium graminearum</i>  | Spore germination inhibition                                               | n.d.                             | The GO@nAg nanocomposite showed almost a 3- and 7-fold increase of inhibition efficiency over pure nAg and GO suspension, respectively.                                                                                                       | Chen et al., 2016        |
| nTiO <sub>2</sub> @MWCNT                                                   | <i>Danio rerio</i> embryos   | Acute toxicity, hatching rate, growth, yolk sac size, and sarcomere length | n.d.                             | TiO <sub>2</sub> @MWCNT hybrid NMs showed no acute toxicity to zebrafish embryos                                                                                                                                                              | Da Silva et al., 2018    |
| GO@nAg                                                                     | Zebrafish embryos            | Mortality, malformation, edema, hatching, total length, and yolk sac size  | n.d.                             | With chorion: LC <sub>50</sub> of GO@nAg hybrid NMs: 1.4 [1.3-1.7] mg/L;<br>Without chorion: LC <sub>50</sub> of GO@nAg hybrid NMs: 1.0 [0.9-1.2] mg/L;<br>The toxic effects of GO@nAg were lower than AgNO <sub>3</sub> , but higher than GO | de Medeiros et al., 2021 |

|                                        |                                           |                                                       |                                                                              |                                                                                                                                                                                                                                                                                                                                            |                        |
|----------------------------------------|-------------------------------------------|-------------------------------------------------------|------------------------------------------------------------------------------|--------------------------------------------------------------------------------------------------------------------------------------------------------------------------------------------------------------------------------------------------------------------------------------------------------------------------------------------|------------------------|
| nSe@nIO                                | <i>Staphylococcus aureus</i>              | Biofilm viability                                     | n.d.                                                                         | The relative fraction of dead-to-live bacteria of the nanocomposites (400.0%) was much higher than that of nSe (51.6%) and nIO (60.0%)                                                                                                                                                                                                     | Li et al., 2020        |
| GO@polyvinylpyrrolidone-stabilized nAg | <i>Pseudomonas aeruginosa</i>             | Bacterial growth inhibition                           | n.d.                                                                         | This hybrid nanocomposite poses enhanced antibacterial activity against carbapenem-resistant <i>P. aeruginosa</i> strains through a possible synergy between toxicity mechanisms of GO nanosheets and nAg                                                                                                                                  | Lozovskis et al., 2020 |
| nTiO <sub>2</sub> @MWCNT-CNF           | <i>Pseudokirchneriella subcapitata</i>    | Growth inhibition and sublethal oxidative stress      | n.d.                                                                         | Acute exposure of <i>P. subcapitata</i> to various concentrations of TiO <sub>2</sub> @MWCNT-CNF nanocomposite may cause algal growth inhibition including undesirable sublethal oxidative stress effects                                                                                                                                  | Malatjie et al., 2022  |
| nZn@nCuO                               | <i>Xenopus laevis</i> embryos             | Bioaccumulation, oxidative stress, and histopathology | n.d.                                                                         | nZn@nCuO nanocomposite does induce only mild acute toxicity in <i>X. laevis</i> embryos. Nevertheless, these effects are smaller than those of nZnO. Interestingly, embryos exposed to the nanocomposite accumulate NPs more efficiently than those exposed to nCuO and nZnO, but the internalized NMs do not induce severe acute toxicity | Mantecca et al., 2015  |
| nAg@GO<br>Chit-nAg@GO                  | <i>Staphylococcus aureus</i><br>UCLA 8076 | Bacterial growth inhibition                           | nAg@GO: 1.90 Ag + 1.5 GO µg/mL<br>Chit-nAg@GO (1:8): 1.19 Ag + 1.41 GO µg/mL | Chit-nAg@GO exhibit higher antibacterial activity than most of the antibacterial agents based on nAg or nAg@GO reported                                                                                                                                                                                                                    | Marta et al., 2015     |
|                                        | <i>Staphylococcus aureus</i><br>1190R     |                                                       |                                                                              |                                                                                                                                                                                                                                                                                                                                            |                        |

|                        |                                |                                                                                                                        |           |                                                                                                                                                                                                                                                                                                                                                                                   |                       |
|------------------------|--------------------------------|------------------------------------------------------------------------------------------------------------------------|-----------|-----------------------------------------------------------------------------------------------------------------------------------------------------------------------------------------------------------------------------------------------------------------------------------------------------------------------------------------------------------------------------------|-----------------------|
| PSF-CNF@nAg            | <i>Bacillus subtilis</i>       | Bacterial growth inhibition                                                                                            | n.d.      | In solid phase the gram-positive bacteria showed higher sensitivity for PSF-CNF@nAg membranes, while in liquid phase the antimicrobial activity of the hybrid membrane is more pronounced towards gram-negative species. Furthermore, in the case of <i>E. coli</i> , the growth inhibition in liquid medium is probably due to the synergetic action of the modified CNF and nAg | Mocanu et al., 2019   |
|                        | <i>Escherichia coli</i>        |                                                                                                                        |           |                                                                                                                                                                                                                                                                                                                                                                                   |                       |
| Ag-nZnO@SWCNT          | <i>Escherichia coli</i>        | Viable cell numbers                                                                                                    | n.d.      | All multicomponent NMs have been reported to possess strong antimicrobial activity towards <i>E. coli</i> and <i>S. aureus</i> bacteria, due to synergistic effect between metal-doped ZnO nanoparticles and carbon nanotubes                                                                                                                                                     | Mohammed et al., 2019 |
| Au-nZnO@SWCNT          |                                |                                                                                                                        |           |                                                                                                                                                                                                                                                                                                                                                                                   |                       |
| Ag-nZnO@MWCNT          |                                |                                                                                                                        |           |                                                                                                                                                                                                                                                                                                                                                                                   |                       |
| Au-nZnO@MWCNT          |                                |                                                                                                                        |           |                                                                                                                                                                                                                                                                                                                                                                                   |                       |
| nAg@GO                 | <i>Escherichia coli</i>        | Antimicrobial effect mean inhibition zone                                                                              | n.d.      | An increase in the inhibition zone with the increase in amount of nAg@GO nanocomposite is obvious due to greater antimicrobial agents                                                                                                                                                                                                                                             | Naeem et al., 2019    |
|                        | <i>Staphylococcus aureus</i>   |                                                                                                                        |           |                                                                                                                                                                                                                                                                                                                                                                                   |                       |
| rGO@nCu <sub>2</sub> O | <i>Escherichia coli</i>        | Bacterial growth inhibition                                                                                            | 5.9 µg/mL | rGO@nCu <sub>2</sub> O nanocomposite have a higher antimicrobial activity toward gram-negative and gram-positive bacteria when compared with reference antibiotics such as kanamycin and streptomycin                                                                                                                                                                             | Selim et al., 2020    |
|                        | <i>Pseudo-monas aeruginosa</i> |                                                                                                                        | 2.9 µg/mL |                                                                                                                                                                                                                                                                                                                                                                                   |                       |
|                        | <i>Bacillus subtilis</i>       |                                                                                                                        | 2.9 µg/mL |                                                                                                                                                                                                                                                                                                                                                                                   |                       |
| nAu@nZnO               | <i>Ruditapes decussatus</i>    | Levels of H <sub>2</sub> O <sub>2</sub> , MDA, intracellular iron and calcium as well as the activities of SOD and CAT | n.d.      | nAu@nZnO hybrid NMs induced biochemical and histological alterations within either the digestive gland or gill tissues at high concentration                                                                                                                                                                                                                                      | Sellami et al., 2017  |

|           |                              |                             |           |                                                                                                                                                                                                                                                                                                                       |                   |
|-----------|------------------------------|-----------------------------|-----------|-----------------------------------------------------------------------------------------------------------------------------------------------------------------------------------------------------------------------------------------------------------------------------------------------------------------------|-------------------|
| nAg@MWCNT | <i>Methylobacterium</i> spp. | Bacterial growth inhibition | 30 µg/mL  | 30 µg/mL of synthesized Ag@MWCNTs yielded an efficient level of antibacterial activity against <i>Methylobacterium</i> spp. and <i>Sphingomonas</i> spp.                                                                                                                                                              | Seo et al., 2014  |
|           | <i>Sphingomonas</i> spp.     |                             |           |                                                                                                                                                                                                                                                                                                                       |                   |
| nAu@nAg   | <i>Escherichia coli</i>      | Bacterial growth inhibition | 10 µg/mL  | Compared with individual nAg and the simple mixture of nAu and nAg, bimetallic nAu@nAg with remarkable stability and a long-term antibacterial efficiency while possessed synergistically enhanced antibacterial activity against both gram-negative and gram-positive bacteria, even at a lower silver concentration | Yang et al., 2017 |
|           | <i>Staphylococcus aureus</i> |                             | 15 µg/mL  |                                                                                                                                                                                                                                                                                                                       |                   |
| nAg@GO    | <i>Escherichia coli</i>      | Bacterial growth inhibition | 3.2 µg/mL | After conjugating to GO sheets, the antibacterial activities of nAg against <i>E. coli</i> and <i>B. subtilis</i> were significantly enhanced                                                                                                                                                                         | Zhu et al., 2013  |
|           | <i>Bacillus subtilis</i>     |                             | 6.4 µg/mL |                                                                                                                                                                                                                                                                                                                       |                   |

<sup>a</sup> N.d. = not determined, Chit – chitosan, CNCs – cellulose nanocrystals, CNF – carbon nanofiber, GO – graphene oxide, IO – iron oxide, MWCNT – multiwall carbon nanotube, PSF – polysulfone, rGO – reduced graphene oxide, SWCNT – single walled carbon nanotube.



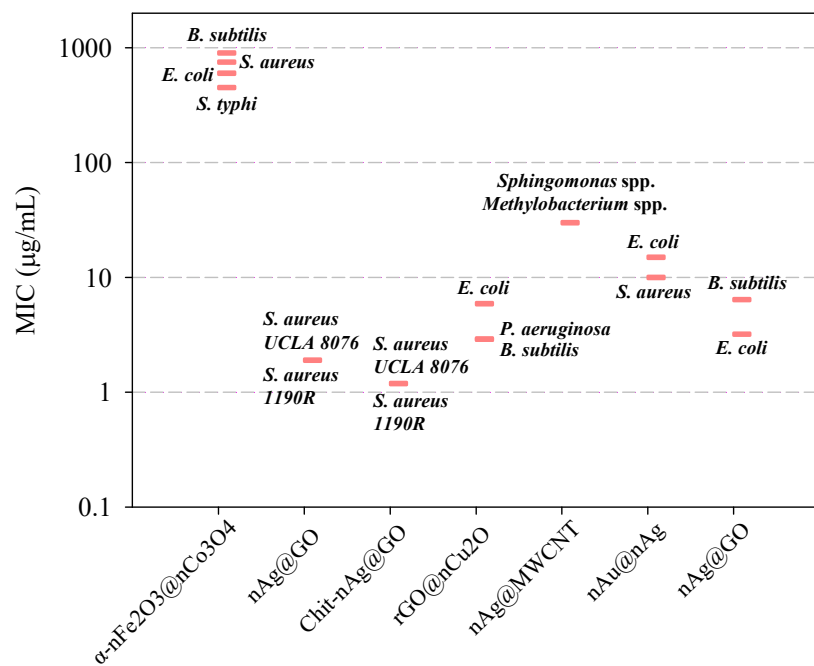

**Figure S2.** Minimum inhibitory concentrations (MICs) for bacteria exposed to multicomponent nanomaterials.

## REFERENCES

- Azevedo, S.L., Holz, T., Rodrigues, J., Monteiro, T., Costa, F.M., Soares, A.M.V.M., Loureiro, S., 2017. A mixture toxicity approach to predict the toxicity of Ag decorated ZnO nanomaterials. *Sci. Total Environ.* 579, 337–344.
- Bhaisare, M.L., Wu, B.-S., Wu, M.-C., Khan, M.S., Tseng, M.-H., Wu, H.-F., 2016. MALDI MS analysis, disk diffusion and optical density measurements for the antimicrobial effect of zinc oxide nanorods integrated in graphene oxide nanostructures. *Biomater. Sci.* 4, 183–194.
- Bhushan, M., Kumar, Y., Periyasamy, L., Viswanath, A.K., 2018. Antibacterial applications of  $\alpha$ -Fe<sub>2</sub>O<sub>3</sub>/Co<sub>3</sub>O<sub>4</sub> nanocomposites and study of their structural, optical, magnetic and cytotoxic characteristics. *Appl. Nanosci.* 8, 137–153.
- Breisch, M., Loza, K., Pappert, K., Rostek, A., Rurainsky, C., Tschulik, K., Heggen, M., Epple, M., Tiller, J.C., Schildhauer, T.A., Köller, M., Sengstock, C., 2020. Enhanced dissolution of silver nanoparticles in a physical mixture with platinum nanoparticles based on the sacrificial anode effect. *Nanotechnology* 31, 055703.
- Chen, J., Sun, L., Cheng, Y., Lu, Z., Shao, K., Li, T., Hu, C., Han, H., 2016. Graphene oxide-silver nanocomposite: novel agricultural antifungal agent against *Fusarium graminearum* for crop disease prevention. *ACS Appl. Mater. Interfaces* 8, 24057–24070.
- Chen, X., Wilke, C.M., Gaillard, J.-F., Gray, K.A., 2020. Combined toxicity of nano-CuO/nano-TiO<sub>2</sub> and CuSO<sub>4</sub>/nano-TiO<sub>2</sub> on *Escherichia coli* in aquatic environments under dark and light conditions. *NanoImpact* 19, 100250.
- Choi, O., Hu, Z., 2009. Role of reactive oxygen species in determining nitrification inhibition by metallic/oxide nanoparticles. *J. Environ. Eng.* 135, 1365–1370.
- Da Silva, G.H., Clemente, Z., Khan, L.U., Coa, F., Neto, L.L.R., Carvalho, H.W.P., Castro, V.L.,

- Martinez, D.S.T., Monteiro, R.T.R., 2018. Toxicity assessment of TiO<sub>2</sub>-MWCNT nanohybrid material with enhanced photocatalytic activity on *Danio rerio* (Zebrafish) embryos. *Ecotoxicol. Environ. Saf.* 165, 136–143.
- Dabour, K., Al Naggar, Y., Masry, S., Naiem, E., Giesy, J.P., 2019. Cellular alterations in midgut cells of honey bee workers (*Apis mellifera* L.) exposed to sublethal concentrations of CdO or PbO nanoparticles or their binary mixture. *Sci. Total Environ.* 651, 1356–1367.
- Das, S., Thiagarajan, V., Chandrasekaran, N., Ravindran, B., Mukherjee, A., 2022. Nanoplastics enhance the toxic effects of titanium dioxide nanoparticle in freshwater algae *Scenedesmus obliquus*. *Comp. Biochem. Phys. C* 256, 109305.
- de Medeiros, A.M.Z., Khan, L.U., da Silva, G.H., Ospina, C.A., Alves, O.L., de Castro, V.L., Martinez, D.S.T., 2021. Graphene oxide-silver nanoparticle hybrid material: an integrated nanosafety study in zebrafish embryos. *Ecotoxicol. Environ. Saf.* 209, 111776.
- Estrela, F.N., Batista Guimarães, A.T., Silva, F.G., Marinho da Luz, T., Silva, A.M., Pereira, P.S., Malafaia, G., 2021. Effects of polystyrene nanoplastics on *Ctenopharyngodon idella* (grass carp) after individual and combined exposure with zinc oxide nanoparticles. *J. Hazard. Mater.* 403, 123879.
- Fang, R., Gong, J., Cao, W., Chen, Z., Huang, D., Ye, J., Cai, Z., 2022. The combined toxicity and mechanism of multi-walled carbon nanotubes and nano copper oxide toward freshwater algae: *Tetrademus obliquus*. *J. Environ. Sci.* 112, 376–387.
- Fasil, D.M., Hamdi, H., Al-Barty, A., Zaid, A.A., Parashar, S.K.S., Das, B., 2021. Selenium and zinc oxide multinutrient supplementation enhanced growth performance in zebra fish by modulating oxidative stress and growth-related gene expression. *Front. Bioeng. Biotechnol.* 9, 721717.

- Haghighat, F., Kim, Y., Sourinejad, I., Yu, I.J., Johari, S.A., 2021. Titanium dioxide nanoparticles affect the toxicity of silver nanoparticles in common carp (*Cyprinus carpio*). *Chemosphere* 262, 127805.
- Hassanein, A., Keller, E., Lansing, S., 2021. Effect of metal nanoparticles in anaerobic digestion production and plant uptake from effluent fertilizer. *Bioresour. Technol.* 321, 124455.
- Hernández-Moreno, D., Li, L., Connolly, M., Conde, E., Fernández, M., Schuster, M., Navas, J.M., Fernández-Cruz, M.-L., 2016. Mechanisms underlying the enhancement of toxicity caused by the coincubation of zinc oxide and copper nanoparticles in a fish hepatoma cell line. *Environ. Toxicol. Chem.* 35, 2562–2570.
- Hernández-Moreno, D., Valdehita, A., Conde, E., Rucandio, I., Navas, J.M., Fernández-Cruz, M.L., 2019. Acute toxic effects caused by the co-exposure of nanoparticles of ZnO and Cu in rainbow trout. *Sci. Total Environ.* 687, 24–33.
- Hong, M., Gong, J.-L., Cao, W.-C., Fang, R., Cai, Z., Ye, J., Chen, Z.-P., Tang, W.-W., 2022. The combined toxicity and mechanism of multi-walled carbon nanotubes and nano zinc oxide toward the cabbage. *Environ. Sci. Pollut. Res.* 29, 3540–3554.
- Hua, J., Peijnenburg, W.J.G.M., Vijver, M.G., 2016. TiO<sub>2</sub> nanoparticles reduce the effects of ZnO nanoparticles and Zn ions on zebrafish embryos (*Danio rerio*). *NanoImpact* 2, 45–53.
- Huang, B., Wei, Z.-B., Yang, L.-Y., Pan, K., Miao, A.-J., 2019. Combined toxicity of silver nanoparticles with hematite or plastic nanoparticles toward two freshwater algae. *Environ. Sci. Technol.* 53, 3871–3879.
- Iswarya, V., Bhuvaneshwari, M., Alex, S.A., Iyer, S., Chaudhuri, G., Chandrasekaran, P.T., Bhalerao, G.M., Chakravarty, S., Raichur, A.M., Chandrasekaran, N., Mukherjee, A., 2015.

- Combined toxicity of two crystalline phases (anatase and rutile) of Titania nanoparticles towards freshwater microalgae: *Chlorella* sp. *Aquat. Toxicol.* 161, 154–169.
- Iswarya, V., Bhuvaneshwari, M., Chandrasekaran, N., Mukherjee, A., 2016. Individual and binary toxicity of anatase and rutile nanoparticles towards *Ceriodaphnia dubia*. *Aquat. Toxicol.* 178, 209–221.
- Iswarya, V., Bhuvaneshwari, M., Chandrasekaran, N., Mukherjee, A., 2018. Trophic transfer potential of two different crystalline phases of TiO<sub>2</sub> NPs from *Chlorella* sp. to *Ceriodaphnia dubia*. *Aquat. Toxicol.* 197, 89–97.
- Iswarya, V., Palanivel, A., Chandrasekaran, N., Mukherjee, A., 2019. Toxic effect of different types of titanium dioxide nanoparticles on *Ceriodaphnia dubia* in a freshwater system. *Environ. Sci. Pollut. Res.* 26, 11998–12013.
- Jahan, S., Alias, Y.B., Bakar, A.F.B.A., Yusoff, I.B., 2018. Toxicity evaluation of ZnO and TiO<sub>2</sub> nanomaterials in hydroponic red bean (*Vigna angularis*) plant: physiology, biochemistry and kinetic transport. *J. Environ. Sci.* 72, 140–152.
- Joško, I., Oleszczuk, P., Skwarek, E., 2017. Toxicity of combined mixtures of nanoparticles to plants. *J. Hazard. Mater.* 331, 200–209.
- Joško, I., Kusiak, M., Xing, B., Oleszczuk, P., 2021. Combined effect of nano-CuO and nano-ZnO in plant-related system: from bioavailability in soil to transcriptional regulation of metal homeostasis in barley. *J. Hazard. Mater.* 416, 126230.
- Joško, I., Krasucka, P., Skwarek, E., Oleszczuk, P., Sheteiwiy, M., 2022. The co-occurrence of Zn- and Cu-based engineered nanoparticles in soils: the metal extractability vs. toxicity to *Folsomia candida*. *Chemosphere* 287 (Pt 3), 132252.

- Jung, E.S., Sivakumar, S., Hong, S.-C., Yi, P.-I., Jang, S.-H., Suh, J.-M., 2020. Influence of relative humidity on germination and metal accumulation in *Vigna radiata* exposed to metal-based nanoparticles. *Sustainability* 12, 1347.
- Kaur, J., Khatri, M., Puri, S., 2019. Toxicological evaluation of metal oxide nanoparticles and mixed exposures at low doses using zebra fish and THP1 cell line. *Environ. Toxicol.* 34, 375–387.
- Kong, I.C., Ko, K.-S., Koh, D.-C., 2021. Comparisons of the effect of different metal oxide nanoparticles on the root and shoot growth under shaking and non-shaking incubation, different plants, and binary mixture conditions. *Nanomaterials* 11, 1653.
- Li, S., Chang, R., Chen, J., Mi, G., Xie, Z., Webster, T.J., 2020. Novel magnetic nanocomposites combining selenium and iron oxide with excellent anti-biofilm properties. *J. Mater. Sci.* 55, 1012–1022.
- Liu, Y., Baas, J., Peijnenburg, W.J.G.M., Vijver, M.G., 2016. Evaluating the combined toxicity of Cu and ZnO nanoparticles: utility of the concept of additivity and a nested experimental design. *Environ. Sci. Technol.* 50, 5328–5337.
- Liu, Y., Wang, S., Wang, Z., Ye, N., Fang, H., Wang, D., 2018. TiO<sub>2</sub>, SiO<sub>2</sub> and ZrO<sub>2</sub> nanoparticles synergistically provoke cellular oxidative damage in freshwater microalgae. *Nanomaterials* 8, 95.
- Lopes, S., Pinheiro, C., Soares, A.M.V.M., Loureiro, S., 2016. Joint toxicity prediction of nanoparticles and ionic counterparts: simulating toxicity under a fate scenario. *J. Hazard. Mater.* 320, 1–9.

- Lozovskis, P., Jankauskaitė, V., Guobienė, A., Kareivienė, V., Vitkauskienė, A., 2020. Effect of graphene oxide and silver nanoparticles hybrid composite on *P. aeruginosa* strains with acquired resistance genes. *Int. J. Nanomedicine* 15, 5147–5163.
- Lu, G., Yang, H., Xia, J., Zong, Y., Liu, J., 2017. Toxicity of Cu and Cr Nanoparticles to *Daphnia magna*. *Water Air Soil Pollut.* 228, 18.
- Malatjie, T.S., Botha, T.L., Kuvarega, A.T., Madima, N., de Bruyn, K., Tekere, M., Nkambule, T.T.I., Mamba, B.B., Msagati, T.A.M., 2022. Toxicity evaluation of TiO<sub>2</sub>/MWCNT-CNF hybrid nanocomposites with enhanced photocatalytic activity toward freshwater microalgae: *Pseudokirchneriella subcapitata*. *Chemosphere* 291, 132891.
- Mansouri, B., Maleki, A., Johari, S.A., Shahmoradi, B., Mohammadi, E., Shamsavari, S., Davari, B., 2016. Copper bioaccumulation and depuration in common carp (*Cyprinus carpio*) following co-exposure to TiO<sub>2</sub> and CuO Nanoparticles. *Arch. Environ. Contam. Toxicol.* 71, 541–552.
- Mansouri, B., Maleki, A., Johari, S.A., Shahmoradi, B., Mohammadi, E., Davari, B., 2017. Histopathological effects of copper oxide nanoparticles on the gill and intestine of common carp (*Cyprinus carpio*) in the presence of titanium dioxide nanoparticles. *Chem. Ecol.* 33, 295–308.
- Mantecca, P., Moschini, E., Bonfanti, P., Fascio, U., Perelshtein, I., Lipovsky, A., Chirico, G., Bacchetta, R., Del Giacco, L., Colombo, A., Gedanken, A., 2015. Toxicity evaluation of a new Zn-doped CuO nanocomposite with highly effective antibacterial properties. *Toxicol. Sci.* 146, 16–30.
- Marcone, G.P.S., Oliveira, Á.C., Almeida, G., Umbuzeiro, G.A., Jardim, W.F., 2012. Ecotoxicity of TiO<sub>2</sub> to *Daphnia similis* under irradiation. *J. Hazard. Mater.* 211–212, 436–442.

- Marta, B., Potara, M., Iliut, M., Jakab, E., Radu, T., Imre-Lucaci, F., Katona, G., Popescu, O., Astilean, S., 2015. Designing chitosan–silver nanoparticles–graphene oxide nanohybrids with enhanced antibacterial activity against *Staphylococcus aureus*. *Colloid. Surface. A* 487, 113–120.
- Miranda, R.R., Damaso da Silveira, A.L.R., de Jesus, I.P., Grötzner, S.R., Voigt, C.L., Campos, S.X., Garcia, J.R.E., Randi, M.A.F., Ribeiro, C.A.O., Filipak Neto, F., 2016. Effects of realistic concentrations of TiO<sub>2</sub> and ZnO nanoparticles in *Prochilodus lineatus* juvenile fish. *Environ. Sci. Pollut. Res.* 23, 5179–5188.
- Mocanu, A., Rusen, E., Diacon, A., Isopencu, G., Mustăţea, G., Şomoghi, R., Dinescu, A., 2019. Antimicrobial properties of polysulfone membranes modified with carbon nanofibers and silver nanoparticles. *Mater. Chem. Phys.* 223, 39–45.
- Mohammed, M.K.A., Ahmed, D.S., Mohammad, M.R., 2019. Studying antimicrobial activity of carbon nanotubes decorated with metal-doped ZnO hybrid materials. *Mater. Res. Express* 6, 055404.
- Muccifora, S., Castillo-Michel, H., Barbieri, F., Bellani, L., Ruffini Castiglione, M., Spanò, C., Pradas del Real, A.E., Giorgetti, L., Tassi, E.L., 2021. Synchrotron radiation spectroscopy and transmission electron microscopy techniques to evaluate TiO<sub>2</sub> NPs incorporation, speciation, and impact on root cells ultrastructure of *Pisum sativum* L. plants. *Nanomaterials* 11, 921.
- Naeem, H., Ajmal, M., Qureshi, R.B., Muntha, S.T., Farooq, M., Siddiq, M., 2019. Facile synthesis of graphene oxide–silver nanocomposite for decontamination of water from multiple pollutants by adsorption, catalysis and antibacterial activity. *J. Environ. Manage.* 230, 199–211.



- Natarajan, L., Jenifer, M.A., Chandrasekaran, N., Suraishkumar, G.K., Mukherjee, A., 2022. Polystyrene nanoplastics diminish the toxic effects of Nano-TiO<sub>2</sub> in marine algae *Chlorella* sp. *Environ. Res.* 204, 112400.
- Ogunsuyi, O.I., Fadoju, O.M., Akanni, O.O., Alabi, O.A., Alimba, C.G., Cambier, S., Eswara, S., Gutleb, A.C., Adaramoye, O.A., Bakare, A.A., 2019. Genetic and systemic toxicity induced by silver and copper oxide nanoparticles, and their mixture in *Clarias gariepinus* (Burchell, 1822). *Environ. Sci. Pollut. Res.* 26, 27470–27481.
- Pikula, K., Johari, S.A., Santos-Oliveira, R., Golokhvast, K., 2022. Individual and binary mixture toxicity of five nanoparticles in marine microalga *Heterosigma akashiwo*. *Int. J. Mol. Sci.* 23, 990.
- Sayadi, M.H., Pavlaki, M.D., Martins, R., Mansouri, B., Tyler, C.R., Kharkan, J., Shekari, H., 2021. Bioaccumulation and toxicokinetics of zinc oxide nanoparticles (ZnO NPs) co-exposed with graphene nanosheets (GNs) in the blackfish (*Capoeta fusca*). *Chemosphere* 269, 128689.
- Sayadi, M.H., Pavlaki, M.D., Loureiro, S., Martins, R., Tyler, C.R., Mansouri, B., Kharkan, J., Shekari, H., 2022. Co-exposure of zinc oxide nanoparticles and multi-layer graphenes in blackfish (*Capoeta fusca*): evaluation of lethal, behavioural, and histopathological effects. *Ecotoxicology* 31, 425–439.
- Selim, M.S., Samak, N.A., Hao, Z., Xing, J., 2020. Facile design of reduced graphene oxide decorated with Cu<sub>2</sub>O nanocube composite as antibiofilm active material. *Mater. Chem. Phys.* 239, 122300.
- Sellami, B., Mezni, A., Khazri, A., Bouzidi, I., Saidani, W., Sheehan, D., Beyrem, H., 2017. Toxicity assessment of ZnO-decorated Au nanoparticles in the Mediterranean clam *Ruditapes decussatus*. *Aquat. Toxicol.* 188, 10–19.

- Seo, Y., Hwang, J., Kim, J., Jeong, Y., Hwang, M.P, Choi, J., 2014. Antibacterial activity and cytotoxicity of multi-walled carbon nanotubes decorated with silver nanoparticles. *Int. J. Nanomedicine* 9, 4621–4629.
- Singh, D., Kumar, A., 2016. Impact of irrigation using water containing CuO and ZnO nanoparticles on *Spinach oleracea* grown in soil media. *Bull. Environ. Contam. Toxicol.* 97, 548–553.
- Singh, D., Kumar, A., 2018. Investigating long-term effect of nanoparticles on growth of *Raphanus sativus* plants: a trans-generational study. *Ecotoxicology* 27, 23–31.
- Singh, D., Kumar, A., 2019. Assessment of toxic interaction of nano zinc oxide and nano copper oxide on germination of *Raphanus sativus* seeds. *Environ. Monit. Assess.* 191, 703.
- Singh, D., Kumar, A., 2020a. Quantification of metal uptake in *Spinacia oleracea* irrigated with water containing a mixture of CuO and ZnO nanoparticles. *Chemosphere* 243, 125239.
- Singh, D., Kumar, A., 2020b. Binary mixture of nanoparticles in sewage sludge: impact on spinach growth. *Chemosphere* 254, 126794.
- Skiba, E., Pietrzak, M., Glińska, S., Wolf, W.M., 2021. The combined effect of ZnO and CeO<sub>2</sub> nanoparticles on *Pisum sativum* L.: a photosynthesis and nutrients uptake study. *Cells* 10, 3105.
- Srivastava, S., Kumar, A., 2017. Comparative cytotoxicity of nanoparticles and ions to *Escherichia coli* in binary mixtures. *J. Environ. Sci.* 55, 11–19.
- Subpiramaniam, S., Hong, S.-C., Yi, P.-I., Jang, S.-H., Suh, J.-M., Jung, E.-S., Park, J.-S., Cho, L.-H., 2021. Influence of sawdust addition on the toxic effects of cadmium and copper oxide nanoparticles on *Vigna radiata* seeds. *Environ. Pollut.* 289, 117311.
- Tong, T., Wilke, C.M., Wu, J., Binh, C.T.T., Kelly, J.J., Gaillard, J.-F., Gray, K.A., 2015. Combined

- toxicity of nano-ZnO and nano-TiO<sub>2</sub> : from single- to multinanomaterial systems. *Environ. Sci. Technol.* 49, 8113–8123.
- Wang, Z., Jin, S., Zhang, F., Wang, D., 2020. Combined toxicity of TiO<sub>2</sub> nanospherical particles and TiO<sub>2</sub> nanotubes to two microalgae with different morphology. *Nanomaterials* 10, 2559.
- Wang, Z., Zhang, F., Vijver, M.G., Peijnenburg, W.J.G.M., 2021. Graphene nanoplatelets and reduced graphene oxide elevate the microalgal cytotoxicity of nano-zirconium oxide. *Chemosphere* 276, 130015.
- Wilke, C.M., Tong, T., Gaillard, J.-F., Gray, K.A., 2016. Attenuation of microbial stress due to nano-Ag and nano-TiO<sub>2</sub> interactions under dark conditions. *Environ. Sci. Technol.* 50, 11302–11310.
- Wilke, C.M., Wunderlich, B., Gaillard, J.-F., Gray, K.A., 2018. Synergistic bacterial stress results from exposure to nano-Ag and nano-TiO<sub>2</sub> mixtures under light in environmental media. *Environ. Sci. Technol.* 52, 3185–3194.
- Xia, J., Zhao, H.Z., Lu, G.H., 2013. Effects of selected metal oxide nanoparticles on multiple biomarkers in *Carassius auratus*. *Biomed. Environ. Sci.* 26, 742–749.
- Yang, L., Yan, W., Wang, H., Zhuang, H., Zhang, J., 2017. Shell thickness-dependent antibacterial activity and biocompatibility of gold@silver core–shell nanoparticles. *RSC Adv.* 7, 11355–11361.
- Yang, Q., Zhang, L., Ben, A., Wu, N., Yi, Y., Jiang, L., Huang, H., Yu, Y., 2018. Effects of dispersible MoS<sub>2</sub> nanosheets and nano-silver coexistence on the metabolome of yeast. *Chemosphere* 198, 216–225.
- Ye, N., Wang, Z., Fang, H., Wang, S., Zhang, F., 2017. Combined ecotoxicity of binary zinc oxide and copper oxide nanoparticles to *Scenedesmus obliquus*. *J. Environ. Sci. Heal. A* 52, 555–

560.

- Ye, N., Wang, Z., Wang, S., Peijnenburg, W.J.G.M., 2018. Toxicity of mixtures of zinc oxide and graphene oxide nanoparticles to aquatic organisms of different trophic level: particles outperform dissolved ions. *Nanotoxicology* 12, 423–438.
- Yin, J., Huang, G., An, C., Feng, R., 2022. Nanocellulose enhances the dispersion and toxicity of ZnO NPs to green algae *Eremosphaera viridis*. *Environ. Sci.: Nano* 9, 393–405.
- Yu, Q., Wang, Z., Wang, G., Peijnenburg, W.J.G.M., Vijver, M.G., 2022. Effects of natural organic matter on the joint toxicity and accumulation of Cu nanoparticles and ZnO nanoparticles in *Daphnia magna*. *Environ. Pollut.* 292, 118413.
- Yu, R., Wu, J., Liu, M., Zhu, G., Chen, L., Chang, Y., Lu, H., 2016a. Toxicity of binary mixtures of metal oxide nanoparticles to *Nitrosomonas europaea*. *Chemosphere* 153, 187–197.
- Yu, R., Wu, J., Liu, M., Chen, L., Zhu, G., Lu, H., 2016b. Physiological and transcriptional responses of *Nitrosomonas europaea* to TiO<sub>2</sub> and ZnO nanoparticles and their mixtures. *Environ. Sci. Pollut. Res.* 23, 13023–13034.
- Zain, N.M., Stapley, A.G.F., Shama, G., 2014. Green synthesis of silver and copper nanoparticles using ascorbic acid and chitosan for antimicrobial applications. *Carbohydr. Polym.* 112, 195–202.
- Zhang, H., Shi, J., Su, Y., Li, W., Wilkinson, K.J., Xie, B., 2020. Acute toxicity evaluation of nanoparticles mixtures using luminescent bacteria. *Environ. Monit. Assess.* 192, 484.
- Zhang, Y., Li, X., Liang, J., Luo, Y., Tang, N., Ye, S., Zhu, Z., Xing, W., Guo, J., Zhang, H., 2022. *Microcystis aeruginosa*'s exposure to an antagonism of nanoplastics and MWCNTs: the disorders in cellular and metabolic processes. *Chemosphere* 288, 132516.

- Zhao, H-Z., Lu, G-H., Xia, J., Jin, S-G., 2012. Toxicity of nanoscale CuO and ZnO to *Daphnia magna*. Chem. Res. Chin. Univ. 28, 209–213.
- Zhao, J., Dai, Y., Wang, Z., Ren, W., Wei, Y., Cao, X., Xing, B., 2018. Toxicity of GO to freshwater algae in the presence of Al<sub>2</sub>O<sub>3</sub> particles with different morphologies: importance of heteroaggregation. Environ. Sci. Technol. 52, 13448–13456.
- Zhu, X., Tan, L., Zhao, T., Huang, W., Guo, X., Wang, J., Wang, J., 2022. Alone and combined toxicity of ZnO nanoparticles and graphene quantum dots on microalgae *Gymnodinium*. Environ. Sci. Pollut. Res. 29, 47310–47322.
- Zhu, Z., Su, M., Ma, L., Ma, L., Liu, D., Wang, Z., 2013. Preparation of graphene oxide–silver nanoparticle nanohybrids with highly antibacterial capability. Talanta 117, 449–455.
